# Supplementary material for: FluidFM as a lithography tool in liquid: spatially controlled deposition of fluorescent nanoparticles
Source: Royal Society of Chemistry journal article supplement (doi:10.1039/c2nr33214k), 2012-12-05
Supplement: c2nr33214k.pdf [file c2nr33214k.pdf]

Supplementary Information

**FluidFM as lithography tool in liquid:**

**Spatially controlled deposition of fluorescent nanoparticles**

Raphael R. Grüter, János Vörös, Tomaso Zambelli\*

Laboratory of Biosensors and Bioelectronics, Institute for Biomedical Engineering, ETH  
Zurich, CH-8092, Switzerland

\*E-mail: [zambelli@biomed.ee.ethz.ch](mailto:zambelli@biomed.ee.ethz.ch)

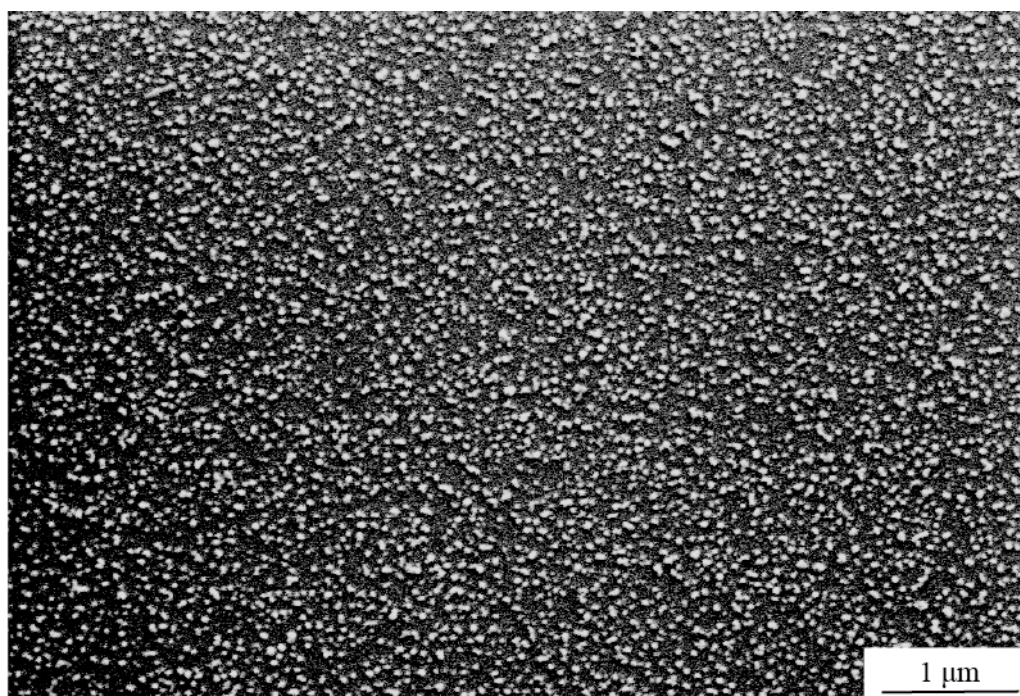

**Fig. S11** SEM image of psNP deposited on a glass slide. The glass slide was covered with PEI and immersed for 30 min into a psNP solution with a salt concentration of 10 mM.

To experimentally determine  $\Theta_{\max}$  a glass slide covered with PEI was dipped into a nanoparticle solution with the same salt concentration as the buffer solution (10 mM) for 30 min until saturation. The corresponding nanoparticle layer was subsequently analysed under SEM determining  $\Theta_{\max} = 16 \pm 1\%$  by means of a statistical analysis of the SEM grey-scale

image like for the similar SEM images in the main text (Fig. 3). The SEM image is shown in Figure SI1.

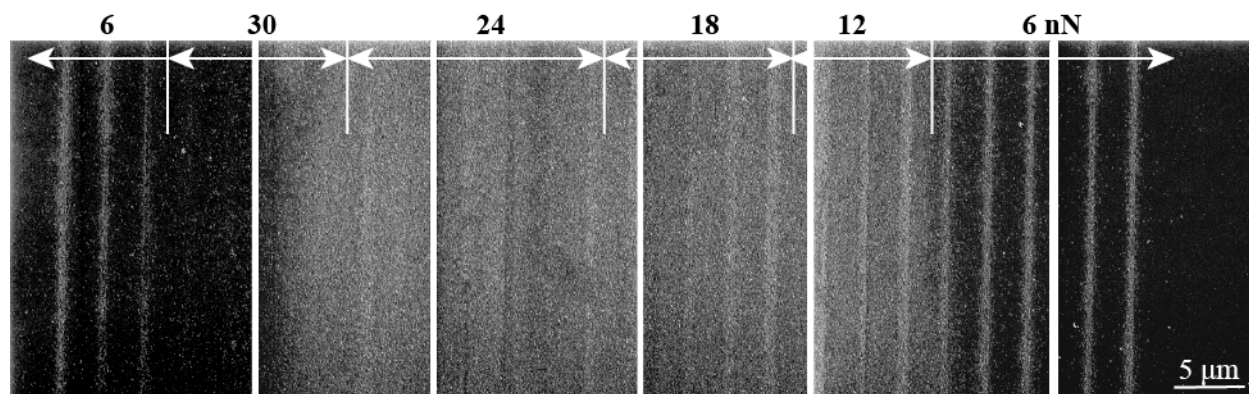

**Fig. SI2** SEM images of the nanoparticle lines deposited with 5 mbar, 20  $\mu\text{m}/\text{sec}$  and different force setpoints from 6 to 30 nN. The lines were deposited from right to left increasing the setpoint. At a force setpoint of 30 nN the psNP deposition is strongly constricted. A return to the initial setpoint of 6 nN (left side) results in a similar deposition pattern as initially (right side).

The deposition pattern in Figure 5 was subsequently analyzed under SEM. The corresponding SEM images are shown in Figure SI2.
